1 **Changes in the Active, Dead, and Dormant Microbial Community Structure Across**  
2 **a Pleistocene Permafrost Chronosequence**

3

4 Running Title:

5

6 Alex Burkert<sup>1</sup>, Thomas A. Douglas<sup>2</sup>, Mark P. Waldrop<sup>3</sup>, and Rachel Mackelprang<sup>1</sup>

7

8 <sup>1</sup> Department of Biology, California State University, Northridge, CA 91330, USA

9

10 <sup>2</sup> U.S. Army Cold Regions Research and Engineering Laboratory, Fort Wainwright,  
11 Alaska 99703, US

12

13 <sup>3</sup> Geology, Minerals, Energy, and Geophysics Science Center, U.S. Geological Survey,  
14 Menlo Park, CA, 94025, USA

15

16 \*Corresponding author information:

17 Address: 18111 Nordhoff St. Northridge, CA 91330

18 Email: [rachel.mackelprang@csun.edu](mailto:rachel.mackelprang@csun.edu)

19 Phone: 818-677-4589

20 Fax: 818-677-2034

21

22 Support:

23 RM: NASA #NNX15AM12G

24 MPW: NASA #NNH15AB58I

25 TAD: U.S. Army Basic Research (6.1) Direct Program to the Engineer Research and  
26 Development Center

27

28 The authors declare no conflict of interest

29 **ABSTRACT**

30 **Permafrost hosts a community of microorganisms that survive and reproduce for**  
31 **millennia despite extreme environmental conditions such as water stress, subzero**  
32 **temperatures, high salinity, and low nutrient availability. Many studies focused on**  
33 **permafrost microbial community composition use DNA-based methods such as**  
34 **metagenomic and 16S rRNA gene sequencing. However, these methods do not**  
35 **distinguish between active, dead, and dormant cells. This is of particular concern in**  
36 **ancient permafrost where constant subzero temperatures preserve DNA from dead**  
37 **organisms and dormancy may be a common survival strategy. To circumvent this**  
38 **we applied: (i) live/dead differential staining coupled with microscopy, (ii)**  
39 **endospore enrichment, and (iii) selective depletion of DNA from dead cells to**  
40 **permafrost microbial communities across a Pleistocene permafrost chronosequence**  
41 **(19K, 27K, and 33K). Cell counts and analysis of 16S rRNA gene amplicons from**  
42 **live, dead, and dormant cells revealed how communities differ between these pools**  
43 **and how they change over geologic time. We found clear evidence that cells capable**  
44 **of forming endospores are not necessarily dormant and that the propensity to form**  
45 **endospores differed among taxa. Specifically, Bacilli are more likely to form**  
46 **endospores in response to long-term stressors associated with permafrost**  
47 **environmental conditions than members of Clostridia, which are more likely to**  
48 **persist as vegetative cells over geologic timescales. We also found that exogenous**  
49 **DNA preserved within permafrost does not bias DNA sequencing results since its**  
50 **removal did not significantly alter the microbial community composition. These**  
51 **results extend the findings of a previous study that showed permafrost age and ice**

52 **content largely control microbial community diversity and cell abundances.**

53

## 54 **IMPORTANCE**

55 **The study of permafrost transcends the study of climate change and**

56 **exobiology. Permafrost soils store more than half earth's soil carbon despite**

57 **covering ~15% of the land area (Tarnocai et al 2009). This permafrost carbon is**

58 **rapidly degraded following thaw (Tarnocai C et al 2009, Schuur et al 2015).**

59 **Understanding microbial communities in permafrost will contribute to the**

60 **knowledge base necessary to understand the rates and forms of permafrost C and N**

61 **cycling post thaw. Permafrost is also an analog for frozen extraterrestrial**

62 **environments and evidence of viable organisms in ancient permafrost is of interest**

63 **to those searching for potential life on distant worlds. If we can identify strategies**

64 **microbial communities utilize to survive permafrost we can focus efforts searching**

65 **for evidence of life on cryogenic cosmic bodies. Our work is significant because it**

66 **contributes to an understanding of how microbial life adapts and survives in the**

67 **extreme environmental conditions in permafrost terrains across geologic timescales.**

68

## 69 **INTRODUCTION**

70 **Permafrost contains active microbial communities that are moderately diverse (1)**

71 **(2). DNA-based methods, such as metagenomics and 16S rRNA gene sequencing, are**

72 **commonly used to interrogate these communities with the underlying assumptions that**

73 **the data represent intact viable cells or that nonviable cells do not strongly affect**

74 **conclusions drawn from whole community DNA. However, DNA from dead cells may**

75 drastically alter estimates of diversity and abundance. Furthermore, because many  
76 communities host dormant cells, DNA-based approaches may not represent active  
77 members. In temperate soils, up to 40% of DNA is from dead or compromised cells (3).  
78 In permafrost, the amount of 'relic' DNA may be even higher because frozen conditions  
79 preserve DNA from dead cells. In non-permafrost environments, multi-omic approaches  
80 provide functional information from RNA and protein, largely overcoming the problems  
81 of dormancy and relic DNA. In permafrost, this strategy has only been successfully  
82 applied in young near-surface permafrost due to low biomass and activity in older  
83 samples (4) (5). Therefore, in older deeper permafrost, other methods must be used to  
84 differentiate between live, dead, and dormant cells.

85         Alternative methods to multi-omics investigations, include microscopy, stable  
86 isotope probing, and physiological measurements with microbial isolates, have been used  
87 on permafrost samples to demonstrate that an active community exists. Electron-  
88 microscope examinations have shown evidence of apparently intact (no visual damage to  
89 cell envelopes), compromised (cell envelope ruptures), and dormant (endospores and  
90 cells with thick capsules) cells in permafrost (6) (7) (8). Using live/dead differential  
91 staining coupled with fluorescence microscopy, Hansen et al (2007) estimated that 26%  
92 of cells from a permafrost microbial community on Svalbard were viable (2). Stable  
93 isotope probing revealed that permafrost microorganisms can build biomass and replicate  
94 their genomes at subzero temperatures as demonstrated through the incorporation of <sup>14</sup>C-  
95 labeled acetate into lipids (9) and DNA (10). Similarly, studies involving permafrost  
96 microbial isolates have discovered microorganisms capable of reproduction at -15°C and  
97 metabolism down to -25°C (11) (12).

98            Though these studies show permafrost microbes exist in active states, dormancy is  
99            still a viable strategy for many taxa. Microorganisms enter dormancy in variety of ways,  
100            though the hardiest and most persistent is the endospore formed by some Gram-positive  
101            taxa in response to nutrient limitation, temperature extremes, or other stressors (13).  
102            However, endospore formation does not appear to be a universal survival strategy in  
103            permafrost because the relative abundance of endospore-forming taxa varies substantially  
104            across the Arctic and sub-Arctic, ranging from vanishingly rare to almost 80% (14) (15)  
105            (16). The abundance may be related to soil physicochemical properties including depth  
106            (17) (18), ice content, and permafrost age (16) (19). Furthermore, endospore-forming  
107            taxa in permafrost are not necessarily dormant. Hultman et al (2015) used RNA to DNA  
108            ratios to show that Firmicutes in young Holocene permafrost are more active than  
109            expected based on DNA abundance alone, demonstrating that dormancy cannot be  
110            inferred based solely on 16S rRNA gene amplicon sequencing (4).

111            While endospore formation may contribute to long-term survivorship in  
112            permafrost it is unclear whether this strategy is optimal across geologic timescales.  
113            Despite resistance to extreme conditions, DNA within an endospore can still accumulate  
114            damage (20). Typically, DNA damage is repaired upon germination by DNA repair  
115            machinery (13). However, damage accumulated over geologic timescales may be beyond  
116            the ability of repair enzymes to remedy. Willerslev et al (2004) amplified 16S rRNA  
117            genes from globally distributed permafrost soils ranging from 0 – 600 kyr old and found  
118            non-endospore-forming Actinobacteria were more highly represented than the endospore-  
119            forming Firmicutes in samples of increasing age (>100 kyr) (19). Johnson et al (2007)  
120            used a uracil-N-glycosylase treatment to break down damaged DNA extracted from

121 ancient permafrost and found Actinobacteria rather than endospore-forming Firmicutes  
122 were more highly represented in the oldest samples (>600 kyr) (21). This suggests  
123 metabolic activity and active DNA repair may be a better survival strategy than  
124 dormancy in increasingly ancient permafrost. Therefore, endospore formation may not  
125 be an optimal survival strategy in permafrost for timescales beyond the Late Pleistocene.

126 Here we address the unresolved question of whether indicators of life (DNA,  
127 spores) in increasingly ancient permafrost are from live viable microbial communities or,  
128 instead, originate from only dead and dormant cells. We hypothesized that dormancy  
129 would increase with age but endospore formation wouldn't be the sole mechanism for  
130 survival. Viable non-endospore forming taxa should also be present and some endospore-  
131 forming cells should exist in a non-dormant state. We also hypothesized that cell  
132 abundance would decrease with age, but cell abundance could also be affected by the  
133 biophysical conditions of the site when it was frozen into permafrost. Further, we asked  
134 whether preserved DNA from dead cells is so compositionally dissimilar from DNA from  
135 live cells that it alters inferences about microbial community structure in permafrost  
136 made with total soil DNA.

137

## 138 **MATERIALS & METHODS**

139 **Permafrost Sample Collection.** We collected frozen permafrost samples from the  
140 United States Cold Regions Research and Engineering Laboratory (CRREL) Permafrost  
141 Tunnel research facility located 16 km north of Fairbanks, Alaska (64.951°N, -  
142 147.621°W) (Figure S1A). The facility includes 300 m of tunnels excavated into the  
143 permafrost. The tunnel where samples were collected extends 110 m horizontally at a

144 depth of ~15 m into a hillside exposing a chronosequence of late Pleistocene permafrost  
145 (Figure S1B) (22) (23). The temperature of the tunnel is maintained by refrigeration at -3  
146 °C. It contains massive ice wedges (24) (25) surrounded by high organic content ice  
147 cemented windblown silt (26). In April 2016, we collected ice cemented silt from three  
148 locations inside the tunnel representing three age categories: 19K (approximately 10 m  
149 from the portal), 27K (54 m), and 33K (88 m) as determined previously by radiocarbon  
150 dating (16). After removing the sublimated surface layer (~5 cm) from the walls of the  
151 tunnel, we collected five replicate cores per age category using a 7.5 x 5 cm key hole saw  
152 attached to a power drill as described previously (16). Cores were shipped back to  
153 California State University, Northridge (CSUN) on dry ice and stored at -20 °C.

154 **Permafrost Subsampling.** For subsampling, we placed cores on autoclaved foil at room  
155 temperature for 10 minutes to allow the outer ~1 cm to thaw and soften. Surface  
156 contamination was removed by scraping the outer layer with an autoclaved knife to  
157 expose the uncontaminated frozen interior. We sub-sectioned the remaining  
158 uncontaminated material using a fresh knife into sterile 50 ml falcon tubes and high-  
159 density polyethylene bags in preparation for downstream treatment.

160 **Soil Chemistry.** Ice content was measured via gravimetric moisture analysis. To  
161 determine pH, soil was diluted 1:1 in a CaCl<sub>2</sub> solution and measured using a Hannah  
162 benchtop meter with attached probe (Hanna Instruments, Woonsocket, RI). Percent total  
163 carbon, organic carbon, total nitrogen, and carbon:nitrogen were measured via dry  
164 combustion and direct measurement of total nutrients using an Elementar analyzer  
165 (Elementar, Langenselbold, Germany). Dissolved organic carbon (DOC) was measured  
166 using diluted meltwater on a Shimadzu total organic carbon (TOC) analyzer (Shimadzu

167 Corporation, Kyoto, Japan). Electrical conductivity (EC) was measured using a digital  
168 benchtop meter with a potentiometric probe submerged in a diluted soil solution (Hanna  
169 Instruments, Woonsocket, RI).

170 **Cell Separation for Enumeration via Microscopy.** For cell enumeration, cells were  
171 separated from the permafrost soil matrix using Nycodenz density cushion centrifugation  
172 as described previously (27) (28) (29) (30) (31). To separate cells from soil debris we  
173 disrupted 1.5 g of soil in a mild detergent consisting of 2 ml of 0.05% Tween 80 and 50  
174 mM tetrasodium pyrophosphate buffer (TTSP) (28) (32) and sonicated for 1 minute at  
175 20V using a QSonica ultrasonicator (QSonica, Newtown, CT) with a 0.3 cm probe.  
176 Sonicated samples were centrifuged at 750 x g for 7 min at 4 °C to remove large particles  
177 and debris. We extracted 600 µl of the supernatant and layered it over 600 µl of 1.3 g/L  
178 Nycodenz (Accurate Chemical, Westbury, NY) solution in a 2 ml tube. The tubes were  
179 centrifuged at 14,000 x g for 30 min at 4 °C. We transferred 600 µl of the upper and  
180 middle phase containing bacterial cells into a sterile 2 ml tube and centrifuged at 10,000 x  
181 g for 15 min at 4 °C. The supernatant was discarded, and the pellet was resuspended in 1  
182 ml of 0.85% NaCl solution.

183 **Live/Dead Staining.** The Live/Dead BacLight Bacterial Viability Kit (Invitrogen  
184 Detection Technologies, Carlsbad, CA) was used to differentially stain live and dead  
185 cells. We added 3 µl of a 1:1 mixture of 3.34 mM SYTO 9 and 20 mM propidium iodide  
186 solution to 1 ml cell suspensions as per the manufacturer's protocols. Stained  
187 suspensions were incubated at room temperature for 15 minutes in the dark to allow the  
188 dyes to permeate cells and bind to DNA.



189 **DAPI Staining.** DAPI staining was performed to obtain total cell counts. After removal  
190 of soil debris (as described above in Cell Separation for Enumeration via Microscopy),  
191 we added 3  $\mu$ l of 14.3 mM DAPI stock solution to each 1 ml cell suspension. Stained  
192 suspensions were incubated in the dark at room temperature for 15 minutes.

193 **Cell Enumeration.** We diluted and vacuum filtered the stained suspensions onto a 25  
194 mm diameter 0.2  $\mu$ m pore size black polycarbonate membrane which we placed on a  
195 slide with sterile forceps. Samples were observed at 100X magnification on a single  
196 focal plane using a Zeiss Axio Imager M2 fluorescence microscope coupled to an  
197 Apotome 2.0 System with appropriate filters for each stain (Zeiss, Oberkochen,  
198 Germany). We counted fifteen fields of view for live/dead and DAPI stained cells for  
199 each sample (33) (34). The average number of cells per field of view was multiplied by  
200 the area of the filter and the dilution factor then corrected for dry weight to calculate the  
201 average number of cells per gram of dry weight.

202 **Cell Separation for DNA Extraction (SHMP Method).** While Nycodenz density  
203 centrifugation is effective at removing soil debris, making it ideal for microscopic  
204 visualization, it is biased against endospores and heavily attached cells (35). To address  
205 this we used a second less-biased method to extract cells for DNA-based analyses (36).  
206 We disrupted 5 g of sample in 25 ml of 1% sodium hexametaphosphate buffer (SHMP)  
207 and sonicated for 1 minute at 20V using a QSonica ultrasonicator with a 0.6 cm probe.  
208 The samples were left for 15 minutes to allow large particles and debris to settle before  
209 transferring the supernatant to a clean 50 ml tube. We added 15 ml of 1% SHMP to the  
210 pellet and sonicated again with a 0.6 cm probe for 1 minute at 20V. The mixture was  
211 incubated for another 15 minutes to allow debris to settle and then we combined the new

212 supernatant with the supernatant from the previous step. To further remove large  
213 particles and debris we centrifuged the combined supernatant at 20 x g for 2 minutes. We  
214 then divided the supernatant equally into two 50 ml tubes as an experimental group  
215 (which received either the propidium monoazide treatment or the lysozyme enzyme  
216 treatment) and a control group (which received no treatment). These tubes were  
217 centrifuged at 10,000 x g for 15 minutes to pellet biomass. The biomass pellet was either  
218 stored at -20 °C to await DNA extraction (in the case of the control pellets) or  
219 immediately used for downstream treatments.

220 **Depletion of DNA from Dead Cells via Propidium Monoazide Treatment.** To deplete  
221 DNA from dead cells we treated cells extracted using the SHMP method with propidium  
222 monoazide (PMAxx, Biotium Inc., Hayward, CA), which is a DNA-intercalating dye  
223 similar to the nucleic acid dye propidium iodide (37). It is selectively permeable, passing  
224 through the impaired membranes of dead cells, but it is unable to penetrate the  
225 membranes of living cells. In the presence of intense bright light, the azide group enables  
226 propidium monoazide to covalently cross link double stranded DNA, preventing its  
227 amplification via PCR (38).

228 For the propidium monoazide treatment we resuspended the extracted cell pellets  
229 in 500 µl of 0.85% NaCl solution and placed them in clear 1.5 ml microcentrifuge tubes.  
230 We added 2.5 µl of 20 mM propidium monoazide solution to each microcentrifuge tube  
231 resulting in a final concentration of 100 µM. We increased the concentration from the  
232 commonly used 50 µM due to the presence of leftover soil debris following cell  
233 extraction as recommended for environmental samples by Heise et al (2016) (39) (40).  
234 Tubes were incubated in the dark at room temperature for 10 minutes. After incubation

235 we placed the tubes on a sheet of foil in an ice bucket to prevent warming. A 500 W  
236 halogen work lamp was placed 20 cm above the samples for 15 minutes. Every five  
237 minutes, we mixed the samples gently to ensure even light distribution. Following light  
238 exposure, we centrifuged samples at 10,000 x g for 15 minutes and discarded the  
239 supernatant. We stored these propidium monoazide treated pellets at -20 °C until use in  
240 downstream DNA extractions.

241 Cell extraction from soil fails to remove all soil particles, which can subsequently  
242 block light penetration and prevent propidium monoazide from cross-linking to DNA.  
243 To verify that our propidium monoazide treatment is effective in the presence of the  
244 small number of remaining particles we extracted cells from temperate control soils  
245 collected from the California State University, Northridge (CSUN) campus, spiked the  
246 sample with  $3.6 \times 10^8$  isopropanol-killed *Escherichia coli* cells, and treated the mixture  
247 with propidium monoazide. We also performed the treatment without *E. coli* spike-ins  
248 on the same temperate control samples. The amount of DNA removed was determined  
249 by comparing the number of copies of the 16S rRNA gene in the spiked and non-spiked  
250 samples before and after treatment (as determined by qPCR—see below for detailed  
251 protocols). The number of 16S rRNA gene copies decreased by ~66% after treatment  
252 (Student's t-test,  $t(8.64) = 3.6$ ,  $p < 0.01$ ) showing that even in the presence of soil  
253 particles, treatment removed 66% of added exogenous DNA.

254 **Endospore Enrichment via Lysozyme Enzyme Treatment.** To separate endospores  
255 from vegetative cells we used a lysozyme enzyme treatment involving three steps:  
256 physical, enzymatic, and chemical cell lysis (hereafter referred to as lysozyme enzyme  
257 treatment following the convention of Wunderlin et al. (2016)) (36). The first physical

258 treatment uses heat to lyse vegetative cells. Second, lysozyme dissolves the cell  
259 membrane followed by a solution of sodium hydroxide (NaOH) and sodium dodecyl  
260 sulfate (SDS) to further disrupt cellular membranes. Finally, a DNase treatment is used  
261 to degrade the DNA from ruptured cells.

262 We resuspended cell pellets extracted using the SHMP method with 900  $\mu$ l of 1X  
263 Tris – EDTA buffer (10 mM Tris and 1 mM EDTA; pH 8) and placed them into 2 ml  
264 tubes. Tubes were placed in a heat block at 60 °C for 10 min with shaking at 80 rpm.  
265 After incubation, we let the tubes cool for 15 min to 37 °C before adding 100  $\mu$ l of  
266 lysozyme solution (20 mg/ml in 1X TE Buffer) and incubating in a heat block at 37 °C  
267 for 60 min with shaking at 80 rpm. After lysis 250  $\mu$ l of 3N NaOH and 100  $\mu$ l of 10 %  
268 SDS was added to the sample, reaching a final volume of 1.35 ml, which we incubated at  
269 room temperature for 60 min at 80 rpm. After the final incubation, we centrifuged the  
270 solution at 10,000 x g for 15 minutes to pellet cell debris and discarded the supernatant.  
271 We resuspended the pellet with 450  $\mu$ l of water, 50  $\mu$ l of 1X DNase reaction buffer and 1  
272  $\mu$ l DNase enzyme (New England Biolabs, Ipswich, MA) and left it for 15 min to remove  
273 DNA from lysed and dead cells. Following the DNase treatment we centrifuged the tubes  
274 for 15 min at 10,000 x g to pellet endospores and discarded the supernatant. The pellet  
275 was then resuspended in 1 ml 0.85% NaCl solution to wash away residual DNase  
276 enzyme. We centrifuged the suspension at 10,000 x g for 15 min, discarded the  
277 supernatant, and stored the lysozyme enzyme treated pellet at -20°C in a sterile  
278 Eppendorf tube until it was used for downstream DNA extraction.

279 To confirm that lysozyme treatment depletes vegetative cells we extracted cells  
280 from temperate control soils collected on the CSUN campus, spiked the samples with 1.4

281  $\times 10^7$  live *E. coli* cells, and performed the lysozyme enzyme treatment. We used the  
282 same treatment on the temperate control soils without *E. coli* spike-ins. By comparing  
283 the number of copies of 16S rRNA genes before and after treatment in the spiked and  
284 non-spiked samples we were able to measure the amount of DNA removed (as  
285 determined by qPCR—see below for detailed protocols). Endospore enrichment  
286 treatment resulted in significant (82%) removal of DNA from vegetative *E.coli* cells  
287 (Student's t-test,  $t(8.02) = -9.68$ ,  $p < 0.01$ ), demonstrating the effectiveness of lysozyme  
288 enzyme treatment in removing vegetative cells.

289 **DNA Extraction.** We performed DNA extractions using a modified bead-beating  
290 protocol capable of lysing endospores, cysts, and cells with thickened walls, all of which  
291 are known to exist in permafrost (8) (42) (43). We resuspended propidium monoazide  
292 treated, lysozyme enzyme treated, and control pellets in 775  $\mu$ l of lysis buffer (0.75M  
293 sucrose, 20 mM EDTA, 40 mM NaCl, 50 mM Tris) and transferred them to a MP Bio  
294 Lysis Matrix E Tube. We added 100  $\mu$ l of 20 mg/ml lysozyme and incubated the samples  
295 at 37°C for 30 minutes. Following incubation, 100  $\mu$ l 10% SDS was added and the  
296 samples were homogenized in an MP Biomedicals FastPrep 24 homogenizer for 20  
297 seconds at 4.0 m/s. We placed the samples in a heat block at 99 °C for 2 minutes and  
298 allowed them to cool at room temperature for 5 minutes. We added 25  $\mu$ l of 20 mg/ml  
299 Proteinase K and incubated samples at 55 °C overnight. The next day we centrifuged the  
300 tubes at 10,000 x g for 15 minutes and transferred the supernatant to a clean 2 ml  
301 Eppendorf tube. We used a FastDNA Spin Kit for Soil (MP Biomedicals, Santa Ana, CA)  
302 for DNA extractions from the lysed cells following the manufacturer's protocols but  
303 omitting the initial lysis step. The DNA was cleaned using a PowerClean DNA Clean-

304 Up (Mo Bio, Carlsbad, CA) and quantified using a Qubit 2.0 fluorometer (Thermofisher  
305 Scientific, Canoga Park, CA).

306 **PCR Amplification and Sequencing of the 16S rRNA gene.** The variable region four  
307 (V4) of bacterial and archaeal 16S rRNA genes from the propidium monoazide treated,  
308 lysozyme enzyme treated, and control groups was amplified as described by Caporaso et  
309 al (2012) but with the addition of 2  $\mu$ l of 20 mg/ml bovine serum albumin in each PCR  
310 reaction. We used the golay barcoded primer set 515F/806R with an added degeneracy  
311 to enhance amplification of archaeal sequences on the 515F primer and thermal cycling  
312 steps recommended by the Earth Microbiome Project protocol version 4.13 (44). The  
313 amplified PCR products from triplicate reactions for each sample were pooled at  
314 approximately equal concentrations, as measured using a PicoGreen dsDNA  
315 Quantification Assay Kit (Thermofisher Scientific, Canoga Park, CA). We quantified the  
316 pooled 16S rRNA gene amplicons by qPCR using an Illumina Library Quantification Kit  
317 (Kapa Biosystems, Wilmington, MA) on a CFX96 Real Time PCR Detection System  
318 (Bio-Rad, Hercules, CA). 16S rRNA gene amplicons were sequenced with a 2 x 150 bp  
319 v2 Reagent Kit on an Illumina MiSeq instrument.

320 We demultiplexed and quality filtered raw fastq data using the Quantitative  
321 Insights Into Microbial Ecology (QIIME) software package version 1.9.1 (45).  
322 Sequences were truncated at the first position with a quality score less than 3. Then  
323 forward and reverse sequences were merged with a minimum merged sequence length of  
324 200 bp, a minimum overlapping length of 20 bp, and a maximum of one difference in the  
325 aligned sequence. All sequences that passed quality filtering were *de novo* clustered into  
326 operational taxonomic units (OTUs) at 97% sequence identity using USEARCH (46).

327 We assigned taxonomy using the RDP classifier (47) with a confidence score of 0.5 (48)  
328 (49). For phylogenetic metrics of diversity, a phylogenetic tree was constructed using  
329 FastTree (50) as implemented in QIIME. We rarefied samples to an equal depth (N =  
330 5000 sequences/sample) for all subsequent analyses. One OTU was only abundant (>3%  
331 relative abundance) in the blank samples and samples which had the lowest DNA yields.  
332 This OTU, from the genus Burkholderia, was removed from all other samples because it  
333 was likely a result of laboratory contamination (51). 16S rRNA gene sequence data were  
334 uploaded to the NCBI's sequence read archive under accession number SRP158034.

335 **Quantitative PCR of the 16S rRNA gene.** qPCR of the V4 region of the 16S rRNA  
336 gene was conducted on propidium monoazide treated and lysozyme treated temperate soil  
337 DNA after receiving a spike in of *E. coli* to evaluate these methods. Amplification was  
338 accomplished using the 515F/806R primer set. Triplicate qPCR reactions were done in  
339 25 µl volumes (12.5 µl of GoTaq qPCR Master Mix (Promega, Madison, WI), 1.25 µl of  
340 each primer (17) (44), 5 µl nuclease free water, and 5 µl of template DNA) in 96 well  
341 plates on a CFX96 Real Time PCR Detection System (Bio-Rad, Hercules, CA). The  
342 thermal cycler program was as follows: 95 °C for 2 min, 40 cycles of (95 °C 15 sec, 60  
343 °C 60 sec), and a melt curve analysis (60-95 °C). Quantified full-length *E. coli* 16S rRNA  
344 gene amplicons were used to make a standard curve. A negative control lacking template  
345 DNA was performed along with each qPCR.

346 **Statistical Analysis.** We tested for differences in soil chemical characteristics between  
347 age categories using a Kruskal Wallis and a Dunn's post hoc test for nonparametric data  
348 using the 'PMCMR' package in R (52). P-values were corrected using the False  
349 Discovery Rate (FDR). Significant differences in the ratio of live to dead cells, the  
350 proportion of live cells, and the direct cell counts for each stain between age categories  
351 was also tested using the same methods.

352 We used the Shannon Diversity Index and phylogenetic diversity metrics to calculate  
353 alpha diversity using the 'alpha\_diversity.py' script in QIIME (53). Differences in alpha  
354 diversity between age categories and treatments were tested the same methods as for soil  
355 chemistry. We computed beta diversity using the weighted UniFrac metric (54).  
356 Differences between samples were visualized using principal coordinate analysis (PCoA)  
357 using the 'phyloseq' package in R (55). We also used non-metric multidimensional  
358 scaling coordinates of microbial community composition between samples for  
359 PerMANOVA analysis as a function of soil chemistry data using the function 'adonis'  
360 from the 'vegan' package in R (54) (56).

361 Differences in the relative abundance of specific taxa between treatments and age  
362 categories were tested using a linear mixed effect model on rank transformed taxa  
363 abundances and nested treatment as a factor within age using the 'nlme' package in R  
364 (57). P-values were corrected using the FDR. The specific taxa indicated were tested for  
365 various pairwise comparisons between treatments and untreated controls for each age  
366 category using a Mann-Whitney-Wilcoxon test using the 'wilcoxon.test' function in R.  
367 Differences in 16S rRNA gene copy number, as quantified using qPCR, between  
368 propidium monoazide treated samples and untreated controls (including samples given a



369 spike in with dead *E. coli* cells) and the endospore enriched samples (given a spike in  
370 with live *E. coli* cells) were tested with a t-test using the ‘t.test’ function in R.

371

## 372 **RESULTS**

373 **Soil Chemistry.** Soil physicochemical properties including ice content, carbon, nitrogen,  
374 pH, and conductivity varied significantly among age categories (Kruskal Wallis,  $p < 0.01$   
375 for all measurements, Table 1). These values were consistently higher in the intermediate  
376 age category compared to the older and younger samples.

377 **Cell Enumeration.** We performed cell counts across the chronosequence using live/dead  
378 and DAPI staining coupled with fluorescent microscopy. Average cell counts ranged  
379 from  $3.6 \times 10^6$  to  $9.2 \times 10^6$  cells [gram dry weight (gdw)<sup>-1</sup>] (live cells),  $1.7 \times 10^7$  to  $4.5 \times$   
380  $10^7$  cells gdw<sup>-1</sup> (dead cells), and  $2.3 \times 10^7$  to  $4.7 \times 10^7$  cells gdw<sup>-1</sup> (total cell count). Live  
381 (Kruskal Wallis,  $X^2(2) = 46.25$ ,  $p < 0.001$ ), dead (Kruskal Wallis,  $X^2(2) = 53.16$ ,  $p <$   
382  $0.001$ ), and total (Kruskal Wallis,  $X^2(2) = 53.58$ ,  $p < 0.001$ ) counts were significantly  
383 different among categories and higher in the intermediate age samples compared with the  
384 oldest (Dunn’s test,  $p < 0.01$ ) and youngest (Dunn’s test,  $p < 0.01$ ) samples (Figure 2A).  
385 The proportion of live cells was significantly higher in intermediate aged samples (26%)  
386 compared to the youngest samples (14%) (Kruskal Wallis,  $X^2(2) = 9.84$ ,  $p < 0.01$ ,  
387 Dunn’s test,  $p < 0.01$ , Figure 2B). In the oldest samples, 25% of the cells were live  
388 though this was not significantly different than the values observed for the youngest or  
389 intermediate aged samples. The ratio of live cells to dead cells did not change  
390 significantly across the chronosequence (Kruskal Wallis,  $X^2(2) = 1.38$ ,  $p > 0.05$ ).

391 **Endospore Enrichment via Lysozyme Enzyme Treatment.** The community of cells  
392 remaining after lysozyme enzyme treatment had reduced alpha-diversity compared with  
393 non-treated controls as measured via phylogenetic richness (Kruskal Wallis,  $p < 0.05$ ,  
394 Figure 2D) and the Shannon Index (Kruskal Wallis,  $p < 0.05$ , Figure S2). The enzyme  
395 treatment increased the relative abundance of three phyla—Firmicutes, Actinobacteria,  
396 and Chlamydiae (Figure 3A). Endospore enrichment tended to increase the relative  
397 abundance of Firmicutes in all age categories but was only significant for the youngest  
398 (Mann-Whitney-Wilcoxon test,  $U = 0$ ,  $p < 0.01$ ) and intermediate (Mann-Whitney-  
399 Wilcoxon test,  $U = 2$ ,  $p < 0.05$ ) age categories. At the class level, endospore enrichment  
400 changed the abundance of Bacilli and Clostridia, but in opposing directions. It increased  
401 the relative abundance of Bacilli across all age categories, growing more pronounced in  
402 the older samples (youngest: 5.8%, intermediate: 9.3%, oldest: 18.6%). These data were  
403 significant for each age category (Mann-Whitney-Wilcoxon test,  $U = 2$ ,  $p < 0.05$ , Figure  
404 3B). In contrast, endospore enrichment significantly decreased the relative abundance of  
405 Clostridia in the oldest age category (10%) (Mann-Whitney-Wilcoxon test,  $U = 2$ ,  $p <$   
406  $0.05$ , Figure 3B). Treatment did not significantly change the relative abundance of  
407 Clostridia in the youngest and intermediate samples. These trends were driven by the  
408 families *Planococcaceae*, *Thermoactinomycetaceae*, *Bacillaceae*, and *Paenibacillaceae*  
409 for Bacilli and the family *Clostridiaceae* for Clostridia (Table 2).

410 Endospore enrichment increased the relative abundance of Actinobacteria in the  
411 youngest age category from 22.4% to 32.8% (Mann-Whitney-Wilcoxon test,  $U = 0$ ,  $p <$   
412  $0.01$ , Figure 3A). This increase was driven by the families *Micrococcaceae* within the  
413 Actinomycetales, as well as the *Gaiellaceae* and *Solirubrobacteraceae* (Table 2). There

414 were no significant differences in Actinobacteria relative abundance due to endospore  
415 enrichment in the intermediate and oldest samples.

416 Chlamydiae relative abundance increased in the youngest age category from 0.7%  
417 to 2.0% as a result of endospore enrichment (Mann-Whitney-Wilcoxon test,  $U = 0$ ,  $p <$   
418  $0.01$ , Figure 3A). This trend was driven by an increase in the relative abundance of the  
419 family *Chlamydiaceae*. All other major taxa including Proteobacteria,  
420 Alphaproteobacteria, Deltaproteobacteria, Bacteroidetes, Acidobacteria, Chloroflexi, and  
421 Planctomycetes decreased in relative abundance due to the endospore enrichment (Table  
422 S1).

423 **Depletion of DNA from Dead Cells via Propidium Monoazide Treatment.** To  
424 determine if DNA from dead cells biases estimates of taxonomic relative abundance from  
425 the whole community we used a propidium monoazide treatment to deplete dead cell  
426 DNA. Depletion did not significantly change the relative abundance of taxa at the  
427 phylum, class, order, or family levels for any of the age categories (Mann-Whitney-  
428 Wilcoxon test,  $p > 0.05$ ). Actinobacteria were consistently less abundant in depleted  
429 samples compared with non-depleted controls. Unlike the results from endospore-  
430 enrichment experiments, propidium monoazide treatment did not change alpha diversity  
431 measurements—there were no significant differences in depleted samples compared with  
432 non-depleted controls (Kruskal Wallis,  $p > 0.05$ , Figure 2D & S2).

433 To confirm propidium monoazide treatment successfully depleted DNA from  
434 dead and membrane-compromised cells we determined 16S rRNA gene copy number in  
435 treated and untreated samples using qPCR. Depletion decreased copy number for the  
436 youngest (~24%, Student's t-test,  $p > 0.05$ ), intermediate (~62%, Student's t-test,  $t(16) =$

437 4.11,  $p < 0.01$ ), and the oldest samples (~58%, Student's t-test,  $t(26) = 5.45$ ,  $p < 0.01$ ,  
438 Figure 2C). 16S rRNA gene copy number varied significant across ages for the depleted  
439 samples (Kruskal Wallis,  $X^2(2) = 25.05$ ,  $p < 0.001$ ) and control samples (Kruskal Wallis,  
440  $X^2(2) = 31.25$ ,  $p < 0.001$ ). The oldest samples had significantly fewer 16S rRNA gene  
441 copies compared to the youngest (Dunn's test,  $p < 0.01$ ) and intermediate (Dunn's test,  $p$   
442  $< 0.01$ ) for both the depleted and control samples (Figure 2C).

443 **16S rRNA gene-based community analysis.** To explore how experimental treatments  
444 influenced overall community structure we compared 16S rRNA gene sequences from  
445 19K, 27K, and 33K old permafrost from treated and control samples ( $n = 5$  replicate  
446 samples  $\times$  3 age categories  $\times$  4 treatments = 60 samples total). Comparisons of diversity  
447 between samples revealed that samples clustered by age regardless of treatment (Figure  
448 S3A). When comparing the samples within each age category, endospore enriched  
449 samples consistently clustered separately from controls and DNA-depleted samples  
450 (Figure S3B-D). Phyla that differed significantly based on age and treatment (endospore  
451 enrichment and depletion of DNA from dead cells) using a linear mixed effect model  
452 included Proteobacteria, Actinobacteria, Firmicutes, Bacteroidetes, Chloroflexi,  
453 Acidobacteria, Planctomycetes, and Chlamydiae (FDR corrected  $p < 0.01$ ).

454 Overall, alpha diversity estimates were highest in the youngest category and  
455 lowest in the intermediate age (Table S2). All soil chemistry measurements correlated  
456 significantly with non-metric multidimensional scaling vectors (PerMANOVA,  $p < 0.05$ ,  
457 Figure S4). Age and ice content were the strongest drivers of community structure  
458 (PerMANOVA,  $R^2 = 0.49$ ,  $F = 181.35$ ,  $p < 0.001$ ; PerMANOVA,  $R^2 = 0.26$ ,  $F = 91.98$ ,  $p$   
459  $< 0.001$ ). Other measurements had a small but significant effect on community structure:

460 DOC (PerMANOVA,  $R^2 = 0.04$ ,  $F = 13.13$ ,  $p < 0.001$ ), C:N (PerMANOVA,  $R^2 = 0.03$ ,  $F$   
461  $= 12.27$ ,  $p < 0.001$ ), Total C (PerMANOVA,  $R^2 = 0.02$ ,  $F = 6.63$ ,  $p < 0.01$ ), and Total N  
462 (PerMANOVA,  $R^2 = 0.01$ ,  $F = 3.43$ ,  $p < 0.05$ ).

463

## 464 **DISCUSSION**

465         In this study we used three complimentary methods—two of which have never  
466 been applied to permafrost—to distinguish between live, dead, and dormant cell types:  
467 live/dead staining, endospore enrichment, and depletion of DNA from dead cells. We  
468 present evidence that endospore-forming organisms observed in DNA-based studies are  
469 not always dormant. Instead, among potential endospore-forming organisms the tendency  
470 to exist as an endospore was taxa dependent. Under the stressful conditions associated  
471 with long-term interment in permafrost, members of class Bacilli were more likely to  
472 exist as endospores in increasingly ancient permafrost while members of Clostridia were  
473 more likely to remain in a non-dormant state. This trend grew more pronounced as  
474 sample age increased. For Bacilli, this trend was driven by the families *Planococcaceae*,  
475 *Thermoactinomycetaceae*, *Bacillaceae*, and *Paenibacillaceae* which are predominantly  
476 aerobes (58). For Clostridia, this trend was driven by the family *Clostridiaceae* which  
477 decreased by over 9% in the endospore-enriched samples compared to non-enriched  
478 controls from the oldest aged category. Most members of the family *Clostridiaceae* are  
479 obligate anaerobes, with metabolic strategies ranging from fermentation to anaerobic  
480 respiration to chemolithoautotrophy (58). The limited oxygen availability in permafrost  
481 could be a stressor that contributes to endospore formation for groups of Bacilli while  
482 anaerobic and metabolically diverse Clostridia are able to persist in a non-dormant state.

483 These data suggest endospore formation is a viable survival strategy for Bacilli against  
484 the conditions of ancient permafrost, at least for the timescales observed in this study.  
485 However, over increasing timescales endospores can accumulate DNA damage. In the  
486 absence of active repair machinery, this damage may become lethal (13) (19) (21).  
487 Further investigations into even older permafrost may show decreases in endospore  
488 forming taxa in favor of organisms that can actively repair DNA damage as has been  
489 suggested previously (19).

490 The presence of endospore-forming Firmicutes is highly variable across Arctic  
491 permafrost though they have been shown to increase in relative abundance over geologic  
492 timescales (16). Tuorto et al (2014) used stable isotope probing to identify active  
493 community members and found that Firmicutes were not among those replicating their  
494 genomes at subzero temperatures with the caveat that stable isotope probing only  
495 identifies taxa that actively replicate their genomes. The study would not have identified  
496 cells that were metabolically active but not dividing during the experimental timeframe.  
497 (10). Other studies demonstrate that endospore-forming taxa are active. For example,  
498 Hultman et al (2015) found the abundance of transcripts from Firmicutes exceeded  
499 expected levels based on the abundance of DNA sequence reads (4).

500 Though our endospore treatment was designed to enrich for true endospores it  
501 also enriched for two other phyla—Actinobacteria and Chlamydiae—but only in the  
502 youngest age category. Actinobacteria were previously found to resist this treatment  
503 perhaps due to their ability to form dormant and spore-like structures (59). In our  
504 samples, members of families *Micrococcaceae*, *Solirubrobacteraceae*, and *Gaiellaceae*  
505 were overrepresented in our endospore-enriched group compared to non-enriched

506 controls. Members of these families can survive radiation, starvation, and extreme  
507 desiccation (21) (58), which may also confer the ability to resist lysozyme treatment.

508         Unexpectedly, Chlamydiae were also more abundant in the endospore-enriched  
509 samples compared to non-enriched controls from the youngest age category. This was  
510 driven exclusively by the family *Chlamydiaceae*, which are not known to have resting  
511 states (58). All genera within this class are obligate intracellular symbionts of  
512 *Acanthamoeba*. *Acanthamoeba* are a genus of single-celled eukaryotes commonly found  
513 in freshwater and soil. They exist in free-living forms and as stress-resistant dormant  
514 cysts (60) which could account for the increase in the relative abundance of Chlamydiae  
515 in the endospore-enriched samples. Several studies have found intact and viable  
516 *Acanthamoeba* cysts in Holocene and Pleistocene permafrost (61) (62). Though we did  
517 not sequence eukaryotic marker genes, it is possible that there are *Acanthamoeba* in our  
518 samples.

519         Depleting DNA from dead cells did not significantly alter microbial community  
520 composition suggesting that sequencing 16S rRNA marker genes from total DNA  
521 provides a reasonable representation of community structure in permafrost. This result  
522 would be expected when death rate and the rate of degradation of dead cells is  
523 proportional among taxa (63). Though depletion experiments did not bias estimates of  
524 relative abundance, it reduced 16S rRNA gene copy number by ~48%, suggesting that  
525 ~1/2 of DNA from permafrost is ‘relic DNA.’ Our estimate of relic DNA is higher than  
526 values taken from temperate soil where ~40% of DNA is relic (3).

527         One potential limitation of using the propidium monoazide treatment to deplete  
528 DNA from dead cells is that soil particles can prevent light penetration and limit efficacy.

529 We attempted to mitigate this concern by extracting biomass from soil particles,  
530 performing intermittent mixing during treatment, and increasing PMA concentration for  
531 particle-rich samples (39). We also confirmed the efficacy of the experiment by spiking  
532 samples with dead *E. coli* cells and showed that even in the presence of soil particles,  
533 treatment removed 66% of added exogenous DNA.

534 Direct cell counts and analysis of 16S rRNA amplicons from permafrost soils  
535 showed that age and ice content were the most important drivers of cell abundance and  
536 microbial diversity, similar to a prior study conducted in the Permafrost Tunnel with  
537 samples collected directly adjacent ours (16). While endospore enrichment significantly  
538 altered microbial community structure within each age group compared to non-enriched  
539 samples, the effects of age and ice content were still much stronger predictors of beta  
540 diversity among samples from all ages.

541 Microbial cell counts ranged from  $2.3 \times 10^7$  to  $4.7 \times 10^7$  cells  $\text{gdw}^{-1}$  and were  
542 consistent with previous studies from Arctic and sub-Arctic permafrost (1) (14) (15) (64)  
543 (65), but were one to two orders of magnitude lower than is commonly observed in  
544 temperate soils (66) (67) (68). Among the three age categories the intermediate had the  
545 highest number of live, dead, and total cells and the highest proportion of live cells. 16S  
546 rRNA gene copy number from total community DNA and from samples depleted of dead  
547 DNA using propidium monoazide showed the highest counts in the intermediate age  
548 category and the lowest counts in the oldest category, similar to cell count data derived  
549 from live/dead staining. The oldest samples also had a markedly higher proportion of live  
550 cells than the youngest samples, though the data narrowly missed the significance cutoff.  
551 The high proportion of live cells in the intermediate and oldest samples may be



552 attributable to the higher levels of DOC measured in those samples. It also may be due to  
553 increased reliance on necromass as labile carbon becomes less available in older samples.  
554 This is supported by metagenomic evidence from Permafrost Tunnel microbes, showing  
555 an increase in the abundance of genes related to scavenging detrital biomass in older  
556 permafrost (16).

557         Though cell counts were highest in the intermediate age category, alpha diversity  
558 was lower compared with the youngest and oldest samples. The decrease in alpha  
559 diversity may reflect the high ice content in those cores, which has been shown  
560 previously to decrease diversity in permafrost (42) (69). The observation that cell counts  
561 are greatest in the intermediate samples is consistent with a previous publication from the  
562 Permafrost Tunnel chronosequence, though counts here are greater by an order of  
563 magnitude. This is likely due to increased cell recovery as a result of our biomass  
564 extraction protocol, which used sonication (rather than vortexing) to separate cells from  
565 soil particles (16).

566         The Live/Dead staining approach uses membrane permeability as a proxy for  
567 viability (70) and has been used extensively in environmental samples (71) (72) (73)  
568 including permafrost (2) (16). One potential drawback to using this approach is that live  
569 cells can incorrectly stain as dead, particularly under dark anoxic conditions (74). We  
570 suggest this is unlikely to impact our samples because permafrost is a generally stable  
571 environment in which membrane potentials are well maintained (75) and we stained  
572 under aerobic conditions in the light. However, if our treatment affected membrane  
573 potentials, this would result in an underestimate of the number of live cells.

574           This study builds on previous work aimed at understanding how microbial  
575 communities adapt to the extreme conditions of permafrost over geologic timescales (16).  
576 We used two strategies never before applied to permafrost (endospore-enrichment and  
577 depletion of DNA from dead organisms) to show that Firmicutes represented in DNA  
578 based studies are not always dormant. We found that preserved DNA from dead  
579 organisms does not bias DNA sequencing results, since its removal using propidium  
580 monoazide did not significantly alter microbial community composition. We confirmed  
581 that both microbial cell counts and diversity decreased between our youngest and oldest  
582 samples and were primarily controlled by sample age and ice content. We also found that  
583 despite the multiple treatments used, differences in community composition among age  
584 categories were robust. There are changes within age categories caused by treatments but  
585 it suggests future studies interrogating microbial communities among diverse permafrost  
586 types may similarly show strong patterns driven by soil physiochemical properties,  
587 including age. Age-driven survival strategies and community structure identified in this  
588 and a companion study from the Permafrost Tunnel (16) may be common across other  
589 types of permafrost.

590           Expanding investigations to older permafrost samples and permafrost representing  
591 different biogeochemical properties will be essential to building a model for how  
592 microorganisms in permafrost survive for geologic timescales. The question of dormancy  
593 is a key building block of this model. While dormancy appears to be a survival strategy  
594 for microbes not well adapted to life in permafrost (e.g. Bacilli, which are commonly  
595 aerobes or facultative anaerobes), those that appear to be better adapted (e.g. Clostridia,  
596 which are typically anaerobes and have a diverse suite of metabolic strategies to draw

597 upon) are less likely to resort to dormancy. This suggests an increase in endospore  
598 formation among maladapted taxa upon entrance to the late Pleistocene, but that  
599 metabolic activity may be increasingly necessary in older permafrost. Expanding the age  
600 range of permafrost and conducting further in-depth studies of current samples (such as  
601 quantitative measurements of endospore markers compared with vegetative cells  
602 markers), will be crucial. If life exists on cryogenic bodies in the solar system, it must  
603 have persisted for longer time scales than exist in Earth's permafrost. Thus, a  
604 chronosequence-based approach to understanding survival may allow us to extrapolate to  
605 more ancient cryoenvironments.

606 Finally, permafrost communities may have an important role in the biogeochemical  
607 cycling of elements and greenhouse gas production following thaw. Our data suggest  
608 DNA-based studies provide a reasonable representation of the taxonomic reservoir  
609 present and poised to decompose soil carbon upon thaw. It also demonstrates that the  
610 taxonomic diversity and the number of cells is governed by soil physicochemical  
611 characteristics of permafrost soil. Communities with less diversity and fewer cells may be  
612 slower to respond to thaw, which has implications for the speed at which carbon is  
613 processed and released into the atmosphere. Our data suggests that the reservoir (both the  
614 number of cells and the diversity) of microbes is controlled by age, carbon, and moisture  
615 content and highlights the need for detailed understanding of how physicochemical  
616 properties shape microbial communities across permafrost environments.

617

618 **REFERENCES**

- 619 1. Steven B, L veill  R, Pollard WH, Whyte LG. 2006. Microbial ecology and  
620 biodiversity in permafrost. *Extremophiles* 10:259–267.
- 621 2. Hansen AA, Herbert RA, Mikkelsen K, Jensen LL, Kristoffersen T, Tiedje JM,  
622 Lomstein BA, Finster KW. 2007. Viability, diversity and composition of the bacterial  
623 community in a high Arctic permafrost soil from Spitsbergen, Northern Norway. *Environ*  
624 *Microbiol* 9:2870–2884.
- 625 3. Carini P, Marsden PJ, Leff JW, Morgan EE, Strickland MS, Fierer N. 2016. Relic  
626 DNA is abundant in soil and obscures estimates of soil microbial diversity. *bioRxiv*  
627 043372.
- 628 4. Hultman J, Waldrop MP, Mackelprang R, David MM, McFarland J, Blazewicz  
629 SJ, Harden J, Turetsky MR, McGuire AD, Shah MB, VerBerkmoes NC, Lee LH,  
630 Mavrommatis K, Jansson JK. 2015. Multi-omics of permafrost, active layer and  
631 thermokarst bog soil microbiomes. *Nature* 521:208–212.
- 632 5. Coolen MJL, Orsi WD. 2015. The transcriptional response of microbial  
633 communities in thawing Alaskan permafrost soils. *Front Microbiol* 6.
- 634 6. Soina VS, Vorobiova EA, Zvyagintsev DG, Gilichinsky DA. 1995. Preservation  
635 of cell structures in permafrost: A model for exobiology. *Adv Space Res* 15:237–242.
- 636 7. V Dmitriev V, E Suzina N, G Rusakova T, A Gilichinskii D, I Duda V. 2001.  
637 Ultrastructural Characteristics of Natural Forms of Microorganisms Isolated from  
638 Permafrost Grounds of Eastern Siberia by the Method of Low-Temperature  
639 Fractionation. *Dokl Biol Sci Proc Acad Sci USSR Biol Sci Sect Transl Russ* 378:304–6.
- 640 8. Soina VS, Mulyukin AL, Demkina EV, Vorobyova EA, El-Registan GI. 2004.  
641 The Structure of Resting Bacterial Populations in Soil and Subsoil Permafrost.  
642 *Astrobiology* 4:345–358.
- 643 9. Rivkina EM, Friedmann EI, McKay CP, Gilichinsky DA. 2000. Metabolic  
644 Activity of Permafrost Bacteria below the Freezing Point. *Appl Environ Microbiol*  
645 66:3230–3233.
- 646 10. Tuorto SJ, Darias P, McGuinness LR, Panikov N, Zhang T, H ggblom MM,  
647 Kerkhof LJ. 2014. Bacterial genome replication at subzero temperatures in permafrost.  
648 *ISME J* 8:139–149.
- 649 11. Bakermans C, Tsapin AI, Souza-Egipsy V, Gilichinsky DA, Neilson KH. 2003.  
650 Reproduction and metabolism at – 10 C of bacteria isolated from Siberian permafrost.  
651 *Environ Microbiol* 5:321–326.
- 652 12. Mykytczuk NCS, Foote SJ, Omelon CR, Southam G, Greer CW, Whyte LG.  
653 2013. Bacterial growth at –15  C; molecular insights from the permafrost bacterium

- 654 *Planococcus halocryophilus* Or1. ISME J 7:1211.
- 655 13. Nicholson WL, Munakata N, Horneck G, Melosh HJ, Setlow P. 2000. Resistance  
656 of Bacillus Endospores to Extreme Terrestrial and Extraterrestrial Environments.  
657 Microbiol Mol Biol Rev 64:548–572.
- 658 14. Jansson JK, Taş N. 2014. The microbial ecology of permafrost. Nat Rev  
659 Microbiol 12:414–425.
- 660 15. Steven B, Briggs G, McKay CP, Pollard WH, Greer CW, Whyte LG. 2007.  
661 Characterization of the microbial diversity in a permafrost sample from the Canadian  
662 high Arctic using culture-dependent and culture-independent methods. FEMS Microbiol  
663 Ecol 59:513–523.
- 664 16. Mackelprang R, Burkert A, Haw M, Mahendrarajah T, Conaway CH, Douglas  
665 TA, Waldrop MP. 2017. Microbial survival strategies in ancient permafrost: insights  
666 from metagenomics. ISME J.
- 667 17. Deng J, Gu Y, Zhang J, Xue K, Qin Y, Yuan M, Yin H, He Z, Wu L, Schuur  
668 EAG, Tiedje JM, Zhou J. 2015. Shifts of tundra bacterial and archaeal communities along  
669 a permafrost thaw gradient in Alaska. Mol Ecol 24:222–234.
- 670 18. Gittel A, Bárta J, Kohoutová I, Mikutta R, Owens S, Gilbert J, Schneckner J, Wild  
671 B, Hannisdal B, Maerz J, Lashchinskiy N, Čapek P, Šantrůčková H, Gentsch N,  
672 Shibistova O, Guggenberger G, Richter A, Torsvik VL, Schleper C, Urich T. 2014.  
673 Distinct microbial communities associated with buried soils in the Siberian tundra. ISME  
674 J 8:841–853.
- 675 19. Willerslev E, Hansen AJ, Rønn R, Brand TB, Barnes I, Wiuf C, Gilichinsky D,  
676 Mitchell D, Cooper A. 2004. Long-term persistence of bacterial DNA. Curr Biol 14:R9–  
677 R10.
- 678 20. Setlow P. 1995. Mechanisms for the prevention of damage to DNA in spores of  
679 Bacillus species. Annu Rev Microbiol 49:29–54.
- 680 21. Johnson SS, Hebsgaard MB, Christensen TR, Mastepanov M, Nielsen R, Munch  
681 K, Brand T, Gilbert MTP, Zuber MT, Bunce M, Rønn R, Gilichinsky D, Froese D,  
682 Willerslev E. 2007. Ancient bacteria show evidence of DNA repair. Proc Natl Acad Sci  
683 104:14401–14405.
- 684 22. Hamilton TD, Craig JL, Sellmann PV. 1988. The Fox permafrost tunnel: A late  
685 Quaternary geologic record in central Alaska. GSA Bull 100:948–969.
- 686 23. Douglas TA, Fortier D, Shur YL, Kanevskiy MZ, Guo L, Cai Y, Bray MT. 2011.  
687 Biogeochemical and geocryological characteristics of wedge and thermokarst-cave ice in  
688 the CRREL permafrost tunnel, Alaska. Permafrost Periglacial Process 22:120–128.
- 689 24. Katayama T, Kato T, Tanaka M, Douglas TA, Brouchkov A, Fukuda M, Tomita

- 690 F, Asano K. 2009. *Glaciibacter superstes* gen. nov., sp. nov., a novel member of the  
691 family Microbacteriaceae isolated from a permafrost ice wedge. *Int J Syst Evol Microbiol*  
692 59:482–486.
- 693 25. Katayama T, Tanaka M, Moriizumi J, Nakamura T, Brouchkov A, Douglas TA,  
694 Fukuda M, Tomita F, Asano K. 2007. Phylogenetic Analysis of Bacteria Preserved in a  
695 Permafrost Ice Wedge for 25,000 Years. *Appl Environ Microbiol* 73:2360–2363.
- 696 26. Douglas TA, Mellon Mt. Sublimation of terrestrial permafrost and the  
697 implications for ice-loss landforms on Mars. *Nat Commun* In review.
- 698 27. Amalfitano S, Fazi S. 2008. Recovery and quantification of bacterial cells  
699 associated with streambed sediments. *J Microbiol Methods* 75:237–243.
- 700 28. Portillo MC, Leff JW, Lauber CL, Fierer N. 2013. Cell Size Distributions of Soil  
701 Bacterial and Archaeal Taxa. *Appl Environ Microbiol* 79:7610–7617.
- 702 29. Eichorst SA, Strasser F, Woyke T, Schintlmeister A, Wagner M, Wobken D.  
703 2015. Advancements in the application of NanoSIMS and Raman microspectroscopy to  
704 investigate the activity of microbial cells in soils. *FEMS Microbiol Ecol* 91.
- 705 30. Lindahl V, Bakken LR. 1995. Evaluation of methods for extraction of bacteria  
706 from soil. *FEMS Microbiol Ecol* 16:135–142.
- 707 31. Poté J, Bravo AG, Mavingui P, Ariztegui D, Wildi W. 2010. Evaluation of  
708 quantitative recovery of bacterial cells and DNA from different lake sediments by  
709 Nycodenz density gradient centrifugation. *Ecol Indic* 10:234–240.
- 710 32. Kallmeyer J, Smith DC, Spivack AJ, D’Hondt S. 2008. New cell extraction  
711 procedure applied to deep subsurface sediments. *Limnol Oceanogr Methods* 6:236–245.
- 712 33. Kepner RL, Pratt JR. 1994. Use of fluorochromes for direct enumeration of total  
713 bacteria in environmental samples: past and present. *Microbiol Rev* 58:603–615.
- 714 34. Epstein SS, Rossel J. 1995. Enumeration of sandy sediment bacteria: search for  
715 optimal protocol. *Oceanogr Lit Rev* 9:759.
- 716 35. Holmsgaard PN, Norman A, Hede SC, Poulsen PHB, Al-Soud WA, Hansen LH,  
717 Sørensen SJ. 2011. Bias in bacterial diversity as a result of Nycodenz extraction from  
718 bulk soil. *Soil Biol Biochem*.
- 719 36. Wunderlin T, Junier T, Paul C, Jeanneret N, Junier P. 2016. Physical Isolation of  
720 Endospores from Environmental Samples by Targeted Lysis of Vegetative Cells. *J Vis*  
721 *Exp*.
- 722 37. Nocker A, Cheung C-Y, Camper AK. 2006. Comparison of propidium monoazide  
723 with ethidium monoazide for differentiation of live vs. dead bacteria by selective removal  
724 of DNA from dead cells. *J Microbiol Methods* 67:310–320.

- 725 38. Nocker A, Sossa-Fernandez P, Burr MD, Camper AK. 2007. Use of Propidium  
726 Monoazide for Live/Dead Distinction in Microbial Ecology. *Appl Environ Microbiol*  
727 73:5111–5117.
- 728 39. Heise J, Nega M, Alawi M, Wagner D. 2016. Propidium monoazide treatment to  
729 distinguish between live and dead methanogens in pure cultures and environmental  
730 samples. *J Microbiol Methods* 121:11–23.
- 731 40. Bae S, Wuertz S. 2009. Discrimination of Viable and Dead Fecal Bacteroidales  
732 Bacteria by Quantitative PCR with Propidium Monoazide. *Appl Environ Microbiol*  
733 75:2940–2944.
- 734 41. Gilichinsky D a., Wilson G s., Friedmann E i., Mckay C p., Sletten R s., Rivkina  
735 E m., Vishnivetskaya T a., Erokhina L g., Ivanushkina N e., Kochkina G a.,  
736 Shcherbakova V a., Soina V s., Spirina E v., Vorobyova E a., Fyodorov-Davydov D g.,  
737 Hallet B, Ozerskaya S m., Sorokovikov V a., Laurinavichyus K s., Shatilovich A v.,  
738 Chanton J p., Ostroumov V e., Tiedje J m. 2007. Microbial Populations in Antarctic  
739 Permafrost: Biodiversity, State, Age, and Implication for Astrobiology. *Astrobiology*  
740 7:275–311.
- 741 42. Steven B, Pollard WH, Greer CW, Whyte LG. 2008. Microbial diversity and  
742 activity through a permafrost/ground ice core profile from the Canadian high Arctic.  
743 *Environ Microbiol* 10:3388–3403.
- 744 43. Niederberger TD, Steven B, Charvet S, Barbier B, Whyte LG. 2009. *Virgibacillus*  
745 *arcticus* sp. nov., a moderately halophilic, endospore-forming bacterium from permafrost  
746 in the Canadian high Arctic. *Int J Syst Evol Microbiol* 59:2219–2225.
- 747 44. Caporaso JG, Lauber CL, Walters WA, Berg-Lyons D, Huntley J, Fierer N,  
748 Owens SM, Betley J, Fraser L, Bauer M, Gormley N, Gilbert JA, Smith G, Knight R.  
749 2012. Ultra-high-throughput microbial community analysis on the Illumina HiSeq and  
750 MiSeq platforms. *ISME J* 6:1621–1624.
- 751 45. Caporaso JG, Kuczynski J, Stombaugh J, Bittinger K, Bushman FD, Costello EK,  
752 Fierer N, Peña AG, Goodrich JK, Gordon JI, Huttley GA, Kelley ST, Knights D, Koenig  
753 JE, Ley RE, Lozupone CA, McDonald D, Muegge BD, Pirrung M, Reeder J, Sevinsky  
754 JR, Turnbaugh PJ, Walters WA, Widmann J, Yatsunenko T, Zaneveld J, Knight R. 2010.  
755 QIIME allows analysis of high-throughput community sequencing data. *Nat Methods*  
756 7:335–336.
- 757 46. Edgar RC. 2010. Search and clustering orders of magnitude faster than BLAST.  
758 *Bioinformatics* 26:2460–2461.
- 759 47. Wang Q, Garrity GM, Tiedje JM, Cole JR. 2007. Naïve Bayesian Classifier for  
760 Rapid Assignment of rRNA Sequences into the New Bacterial Taxonomy. *Appl Environ*  
761 *Microbiol* 73:5261–5267.
- 762 48. Claesson MJ, O’Sullivan O, Wang Q, Nikkilä J, Marchesi JR, Smidt H, Vos WM

- 763 de, Ross RP, O’Toole PW. 2009. Comparative Analysis of Pyrosequencing and a  
764 Phylogenetic Microarray for Exploring Microbial Community Structures in the Human  
765 Distal Intestine. *PLOS ONE* 4:e6669.
- 766 49. Liu Z, DeSantis TZ, Andersen GL, Knight R. 2008. Accurate taxonomy  
767 assignments from 16S rRNA sequences produced by highly parallel pyrosequencers.  
768 *Nucleic Acids Res* 36:e120.
- 769 50. Price MN, Dehal PS, Arkin AP. 2009. FastTree: Computing Large Minimum  
770 Evolution Trees with Profiles instead of a Distance Matrix. *Mol Biol Evol* 26:1641–1650.
- 771 51. Salter SJ, Cox MJ, Turek EM, Calus ST, Cookson WO, Moffatt MF, Turner P,  
772 Parkhill J, Loman NJ, Walker AW. 2014. Reagent and laboratory contamination can  
773 critically impact sequence-based microbiome analyses. *BMC Biol* 12:87.
- 774 52. Thorsten Pohlert. 2014. The Pairwise Multiple Comparison of Mean Ranks  
775 Package (PMCMR). R Package.
- 776 53. Faith DP. 1992. Conservation evaluation and phylogenetic diversity. *Biol Conserv*  
777 61:1–10.
- 778 54. Lozupone C, Knight R. 2005. UniFrac: a New Phylogenetic Method for  
779 Comparing Microbial Communities. *Appl Environ Microbiol* 71:8228–8235.
- 780 55. McMurdie PJ, Holmes S. 2013. phyloseq: An R Package for Reproducible  
781 Interactive Analysis and Graphics of Microbiome Census Data. *PLOS ONE* 8:e61217.
- 782 56. Dixon P, Palmer MW. 2003. VEGAN, a package of R functions for community  
783 ecology. *J Veg Sci* 14:927–930.
- 784 57. José Pinheiro and Douglas Bates. 2017. Package “nlme”: Linear and Nonlinear  
785 Mixed Effects Models. R Package.
- 786 58. 1964. BERGEY’S MANUAL OF DETERMINATIVE BACTERIOLOGY (7th  
787 ed.). Am J Public Health Nations Health.
- 788 59. Wunderlin T, Junier T, Roussel-Delif L, Jeanneret N, Junier P. 2014. Endospore-  
789 enriched sequencing approach reveals unprecedented diversity of Firmicutes in  
790 sediments. *Environ Microbiol Rep* 6:631–639.
- 791 60. Marciano-Cabral F, Cabral G. 2003. Acanthamoeba spp. as Agents of Disease in  
792 Humans. *Clin Microbiol Rev* 16:273–307.
- 793 61. Podlipaeva I, Shmakov LA, Gilichinskiĭ DA, Gudkov AV. 2006. [Heat shock  
794 protein of HSP70 family revealed in some contemporary freshwater Amoebae and in  
795 Acanthamoeba sp. from cysts isolated from permafrost samples]. *Tsitologĭia* 48:691–694.
- 796 62. Shmakova LA, Rivkina EM. 2015. Viable eukaryotes of the phylum Amoebozoa



- 797 from the Arctic permafrost. *Paleontol J* 49:572–577.
- 798 63. Lennon JT, Placella SA, Muscarella ME. 2017. Relic DNA contributes minimally  
799 to estimates of microbial diversity. *bioRxiv* 131284.
- 800 64. Singh P, Singh SM, Singh RN, Naik S, Roy U, Srivastava A, Bölter M. Bacterial  
801 communities in ancient permafrost profiles of Svalbard, Arctic. *J Basic Microbiol* n/a–  
802 n/a.
- 803 65. Rivkina E, Gilichinsky D, Wagener S, Tiedje J, McGrath J. 1998.  
804 Biogeochemical activity of anaerobic microorganisms from buried permafrost sediments.  
805 *Geomicrobiol J* 15:187–193.
- 806 66. Christensen H, Hansen M, Sørensen J. 1999. Counting and Size Classification of  
807 Active Soil Bacteria by Fluorescence In Situ Hybridization with an rRNA  
808 Oligonucleotide Probe. *Appl Environ Microbiol* 65:1753–1761.
- 809 67. Pershina E, Valkonen J, Kurki P, Ivanova E, Chirak E, Korvigo I, Provorov N,  
810 Andronov E. 2015. Comparative Analysis of Prokaryotic Communities Associated with  
811 Organic and Conventional Farming Systems. *PLOS ONE* 10:e0145072.
- 812 68. Torsvik V, Øvreås L. 2002. Microbial diversity and function in soil: from genes to  
813 ecosystems. *Curr Opin Microbiol* 5:240–245.
- 814 69. Gilichinsky DA. 2002. Permafrost Model of Extraterrestrial Habitat, p. 125–142.  
815 *In Astrobiology*. Springer, Berlin, Heidelberg.
- 816 70. Bernardini J. N., La Duc M. T., Diamond R., Verceles J. 2012. Fluorescence-  
817 Activated Cell Sorting of Live Versus Dead Bacterial Cells and Spores. *NASA Tech*  
818 *Briefs* 22.
- 819 71. Leuko S, Legat A, Fendrihan S, Stan-Lotter H. 2004. Evaluation of the  
820 LIVE/DEAD BacLight Kit for Detection of Extremophilic Archaea and Visualization of  
821 Microorganisms in Environmental Hypersaline Samples. *Appl Environ Microbiol*  
822 70:6884–6886.
- 823 72. Bianciotto V, Minerdi D, Perotto S, Bonfante P. 1996. Cellular interactions  
824 between arbuscular mycorrhizal fungi and rhizosphere bacteria. *Protoplasma* 193:123–  
825 131.
- 826 73. Biggerstaff JP, Le Puil M, Weidow BL, Prater J, Glass K, Radosevich M, White  
827 DC. 2006. New methodology for viability testing in environmental samples. *Mol Cell*  
828 *Probes* 20:141–146.
- 829 74. Kirchhoff C, Cypionka H. 2017. Propidium ion enters viable cells with high  
830 membrane potential during live-dead staining. *J Microbiol Methods*.
- 831 75. Ponder MA, Thomashow MF, Tiedje JM. 2008. Metabolic activity of Siberian

832 permafrost isolates, *Psychrobacter arcticus* and *Exiguobacterium sibiricum*, at low water  
833 activities. *Extremophiles* 12:481–490.

834

## 835 **ACKNOWLEDGEMENTS**

836 This work was supported by the National Aeronautics and Space Administration (NASA)  
837 (grant numbers NNX15AM12G and NNH15AB58I). AB acknowledges support from the  
838 California State University, Northridge Biology Department Graduate Student Tuition  
839 Waiver. We thank Steven Escalante, Tara Mahendrarajah David Romero, and Archana  
840 Srinivas for assistance with permafrost subsampling.

841

## 842 **FIGURE CAPTIONS**

843

844 **Figure 1.** Experimental strategy overview. Live, dead, and dormant cell counts were  
845 conducted by separating cells from soil using a Nycodenz density centrifugation, staining  
846 with a Live/Dead differential stain or DAPI, and counting via fluorescence microscopy.  
847 For the endospore enrichment and dead cell depletion experiments, we separated biomass  
848 from soil using a gravity separation technique. To deplete DNA from dead organisms,  
849 cell mixtures were treated with propidium monoazide and then exposed to light, causing  
850 cross-links with DNA not enclosed by an intact cell envelope or spore coat. The cross-  
851 links inhibit downstream PCR amplification. To enrich for endospores, cell mixtures  
852 were exposed to lysozyme, heat, and DNase, which lyses vegetative cells and degrades  
853 DNA. In both the endospore enrichment and dead cell depletion experiments, the 16S  
854 rRNA gene was amplified and used for downstream analysis.

855

856 **Figure 2.** (A) Direct cell counts as determined by cell staining and fluorescent  
857 microscopy. Live/dead and total (DAPI) counts. (B) Proportion of live cells as

858 determined by direct counts of live cells (stained with SYTO 9) and total cells (stained  
859 with DAPI). (C) 16S rRNA gene copy number in samples depleted of dead DNA using  
860 propidium monoazide and non-depleted controls. qPCR of the V4 region of the 16S  
861 rRNA gene in samples showed that average copy number decreased for all age groups in  
862 the propidium monoazide treated group (DNA depleted samples) compared to the  
863 untreated group (non-depleted controls) and that there was a decrease in viable DNA  
864 across the three age categories. (D) Phylogenetic diversity index compared across age  
865 categories and treatment types. Values show the average of five replicate cores and error  
866 bars show the standard error of the mean. Significant p-values tested by Dunn's post-hoc  
867 test are indicated (\*  $p < 0.05$ , \*\*  $p < 0.01$ ).

868

869

870 **Figure 3.** (A) Phylum-level changes in relative abundance due to endospore enrichments.  
871 (B) Class-level changes in relative abundance due to endospore enrichments. Values  
872 show averages of five replicate cores and error bars show standard error of the mean.  
873 Significant p-values tested by the Mann-Whitney-Wilcoxon test are indicated (\*  $p < 0.05$ ,  
874 \*\*  $p < 0.01$ ).

875

876 **Table 1.** Permafrost physicochemical characteristics across the three time periods. Values  
877 are averages of five replicates plus/minus one standard error of the mean. Statistical  
878 differences were tested using a Kruskal Wallis test and a Dunn's post hoc test with p-  
879 values corrected using the False Discovery Rate. Significant p-values ( $p < 0.05$ ) are  
880 show in bold.

881

882 **Table 2.** Average percent difference in relative abundance between the endospore-  
883 enriched samples and non-enriched controls across the three age categories. A negative  
884 value shows underrepresentation in the endospore-enriched samples compared to the non-  
885 enriched controls while a positive value shows overrepresentation. Values show averages  
886 of five replicate cores.

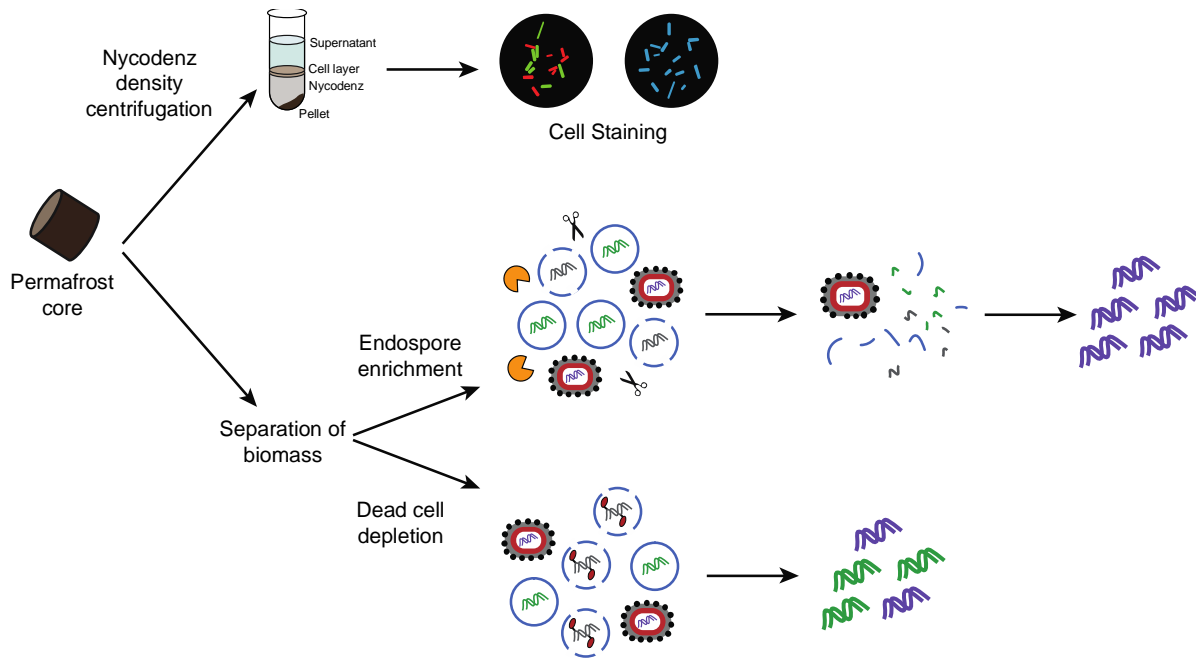

1  
2 **Figure 1.** Experimental strategy overview. Live, dead, and dormant cell counts were conducted  
3 by separating cells from soil using a Nycodenz density centrifugation, staining with a Live/Dead  
4 differential stain or DAPI, and counting via fluorescence microscopy. For the endospore  
5 enrichment and dead cell depletion experiments, we separated biomass from soil using a gravity  
6 separation technique. To deplete DNA from dead organisms, cell mixtures were treated with  
7 propidium monoazide and then exposed to light, causing cross-links with DNA not enclosed by  
8 an intact cell envelope or spore coat. The cross-links inhibit downstream PCR amplification. To  
9 enrich for endospores, cell mixtures were exposed to lysozyme, heat, and DNase, which lyses  
10 vegetative cells and degrades DNA. In both the endospore enrichment and dead cell depletion  
11 experiments, the 16S rRNA gene was amplified and used for downstream analysis.

12

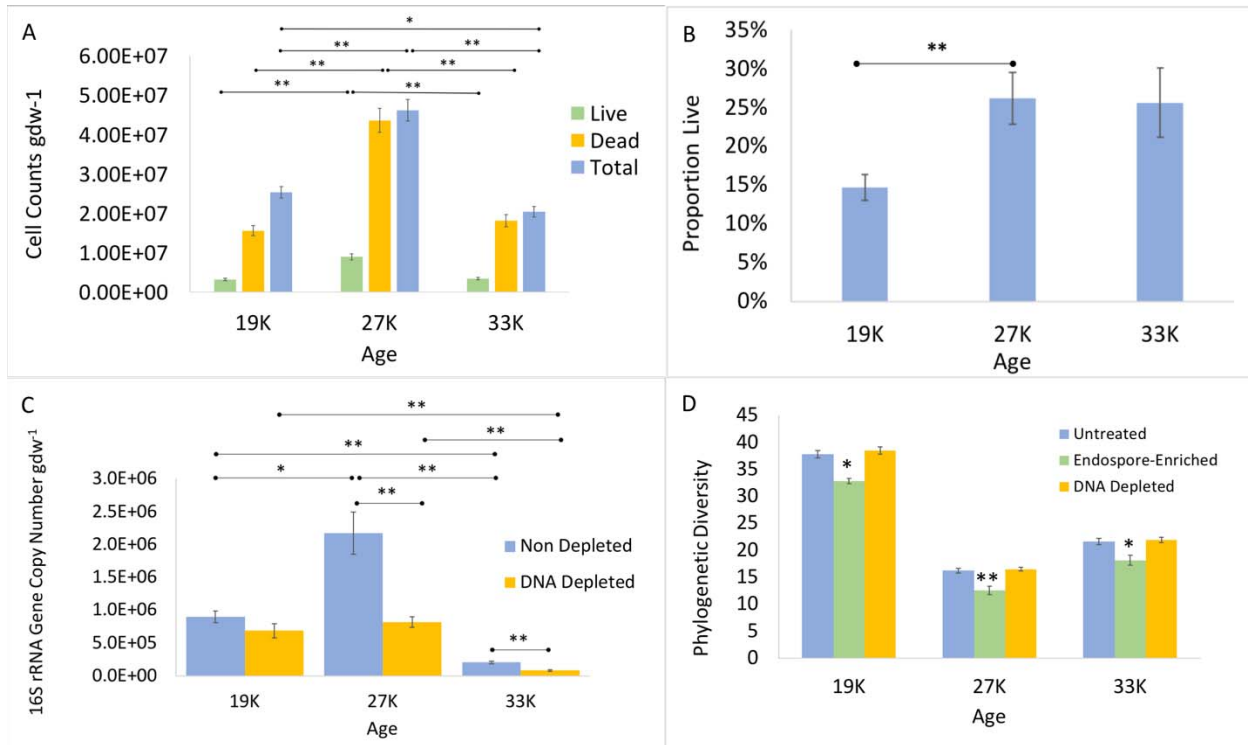

13

14 **Figure 2.** (A) Direct cell counts as determined by cell staining and fluorescent microscopy.  
15 Live/dead and total (DAPI) counts. (B) Proportion of live cells as determined by direct counts of  
16 live cells (stained with SYTO 9) and total cells (stained with DAPI). (C) 16S rRNA gene copy  
17 number in samples depleted of dead DNA using propidium monoazide and non-depleted  
18 controls. qPCR of the V4 region of the 16S rRNA gene in samples showed that average copy  
19 number decreased for all age groups in the propidium monoazide treated group (DNA depleted  
20 samples) compared to the untreated group (non-depleted controls). (D) Phylogenetic diversity  
21 index compared across age categories and treatment types. Values show the average of five  
22 replicate cores and error bars show the standard error of the mean. Significant p-values tested by  
23 Dunn's post-hoc test are indicated (\*  $p < 0.05$ , \*\*  $p < 0.01$ ).

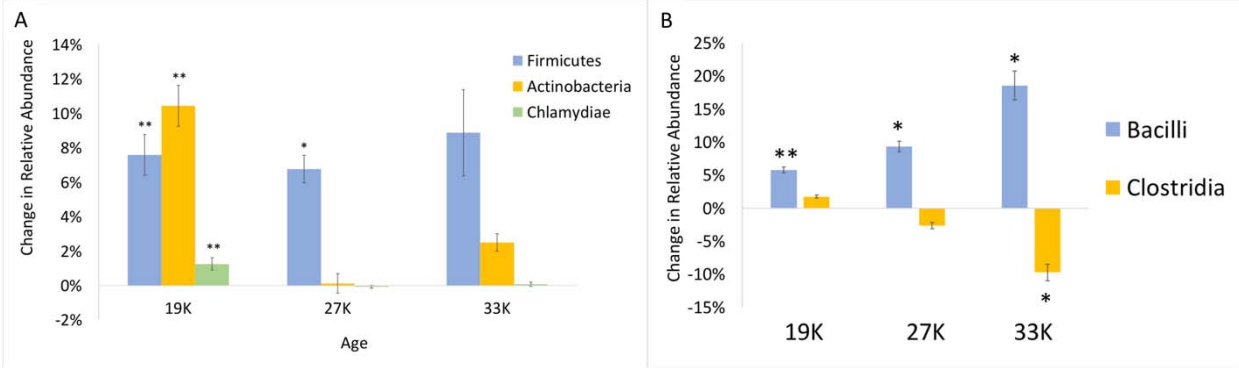

24

25 **Figure 3.** (A) Phylum-level changes in relative abundance due to endospore enrichments. (B)  
26 Class-level changes in relative abundance due to endospore enrichments. Values show averages  
27 of five replicate cores and error bars show standard error of the mean. Significant p-values tested  
28 by the Mann-Whitney-Wilcoxon test are indicated (\*  $p < 0.05$ , \*\*  $p < 0.01$ ).



29 **Table 1.** Permafrost physicochemical characteristics across the three time periods. Values are averages of five replicates plus/minus  
 30 one standard error of the mean. Statistical differences were tested using a Kruskal Wallis test and a Dunn's post hoc test with p-values  
 31 corrected using the False Discovery Rate. Significant p-values ( $p < 0.05$ ) are show in bold.

|                 | 19K          | p-value<br>(19K vs 27K) | 27K          | p-value<br>(27K vs 33K) | 33K          | p-value<br>(33K vs 19K) | Kruskal Wallis<br>$X^2(2)$ p-value |              |
|-----------------|--------------|-------------------------|--------------|-------------------------|--------------|-------------------------|------------------------------------|--------------|
| Ice Content (%) | 27.70 ± 1.73 | <b>0.001</b>            | 50.01 ± 4.16 | 0.077                   | 35.30 ± 0.50 | 0.077                   | 12.5                               | <b>0.002</b> |
| Total C (%)     | 1.64 ± 0.18  | <b>0.003</b>            | 3.47 ± 0.19  | 0.229                   | 3.06 ± 0.08  | 0.061                   | 10.82                              | <b>0.004</b> |
| Organic C (%)   | 1.62 ± 0.16  | <b>0.014</b>            | 2.99 ± 0.30  | 0.724                   | 2.76 ± 0.06  | <b>0.020</b>            | 9.5                                | <b>0.009</b> |
| Total N (%)     | 0.16 ± 0.02  | <b>0.013</b>            | 0.30 ± 0.01  | 0.943                   | 0.29 ± 0.01  | <b>0.013</b>            | 9.45                               | <b>0.009</b> |
| C/N Ratio       | 10.45 ± 0.34 | <b>0.013</b>            | 11.70 ± 0.11 | 0.944                   | 10.62 ± 0.17 | <b>0.013</b>            | 9.38                               | <b>0.009</b> |
| pH              | 7.32 ± 0.04  | 0.203                   | 7.46 ± 0.05  | <b>0.004</b>            | 6.88 ± 0.10  | 0.084                   | 10.26                              | <b>0.006</b> |
| EC (dS/m)       | 0.39 ± 0.02  | <b>0.003</b>            | 0.87 ± 0.04  | 0.072                   | 0.46 ± 0.03  | 0.179                   | 11.18                              | <b>0.004</b> |
| DOC (ppm)       | 3141 ± 162   | <b>0.009</b>            | 9338 ± 1649  | 0.524                   | 5776 ± 212   | <b>0.029</b>            | 9.78                               | <b>0.008</b> |

**Table 2.** Average percent difference in relative abundance between the endospore-enriched samples and non-enriched controls across the three age categories. A negative value shows underrepresentation in the endospore-enriched samples compared to the non-enriched controls while a positive value shows overrepresentation. Values show averages of five replicate cores.

| Taxa           | Family                        | 19K (%)      | U-value | 27K (%)      | U-value | 33K (%)       | U-value |
|----------------|-------------------------------|--------------|---------|--------------|---------|---------------|---------|
| Actinobacteria | <i>Micrococcaceae</i>         | 2.4 ± 0.5 ** | 0       | 0.0 ± 0.0    | 9.5     | 0.0 ± 0.0     | 11      |
|                | <i>Solirubrobacteraceae</i>   | 1.5 ± 0.4    | 3       | 0.6 ± 0.3    | 4       | 0.1 ± 0.1     | 5       |
|                | <i>Gaiellaceae</i>            | 1.0 ± 0.3 *  | 1       | -0.2 ± 0.1   | 8       | 0.1 ± 0.1     | 8.5     |
| Bacilli        | <i>Planococcaceae</i>         | 2.4 ± 0.9    | 4       | -8.5 ± 1.0 * | 1       | 4.0 ± 2.6     | 8       |
|                | <i>Thermoactinomycetaceae</i> | 0.4 ± 0.1*   | 0       | 20 ± 2.5 *   | 2       | 7.8 ± 2.2     | 6       |
|                | <i>Bacillaceae</i>            | 0.7 ± 0.1 *  | 0       | -2.5 ± 1.2   | 8       | 1.0 ± 0.4     | 9       |
|                | <i>Paenibacillaceae</i>       | 2.5 ± 0.4 *  | 0       | 0.4 ± 1.6    | 12      | 5.6 ± 2.7     | 4       |
| Clostridia     | <i>Clostridiaceae</i>         | 3.1 ± 0.4 ** | 0       | -2.5 ± 1.5   | 5       | -9.2 ± 1.2 ** | 0       |

(Mann-Whitney-Wilcoxon test, \*\*  $p < 0.01$ , \*  $p < 0.05$ ).
